# Supplementary material for: Smartphone-Controlled Aptasensor for Voltammetric Detection of Patulin in Apple Juice
Source: MDPI journal article supplement (doi:10.3390/s24030754), 2024-01-24
Supplement: s1 [file s1]

## *Supplementary Material*

### **Smartphone-Controlled Aptasensor for Voltammetric Detection of Patulin in Apple Juice**

**Arzum Erdem\* and Huseyin Senturk**

Analytical Chemistry Department, Faculty of Pharmacy, Ege University, Bornova,  
35100, Izmir, TURKEY

**\*Corresponding author (A. Erdem):** arzum.erdem@ege.edu.tr

#### *Safety information*

**Patulin:** GSH06; Hazard Classifications: Acute Tox. 2 Oral - Skin Irrit. 2; Hazard Statements: H300 - H315; Storage Class Code: 6.1A - Combustible, acute toxic Cat. 1 and 2 / very toxic hazardous materials; WGK: WGK3

**Fumonisin B1:** GHS02,GHS07; Hazard Classifications: Acute Tox. 4 Oral - Eye Irrit. 2 - Flam. Liq. 2; Hazard Statements: H225 - H302 - H319; Storage Class Code: 3 - Flammable liquids; WGK: WGK 2

**Deoxynivalenol:** GHS02,GHS07; Hazard Classifications: Acute Tox. 4 Dermal - Acute Tox. 4 Inhalation - Acute Tox. 4 Oral - Eye Irrit. 2 - Flam. Liq. 2; Hazard Statements: H225 - H302 + H312 + H332 - H319; Storage Class Code: 3 - Flammable liquids; WGK: WGK 2

**Ochratoxin A:** GHS02,GHS07; Hazard Classifications: Acute Tox. 4 Dermal - Acute Tox. 4 Inhalation - Acute Tox. 4 Oral - Eye Irrit. 2 - Flam. Liq. 2; Hazard Statements: H225 - H302 + H312 + H332 - H319; Storage Class Code: 3 - Flammable liquids; WGK: WGK 2

**Table S1.** The average current values ( $n=3$ ) of redox probe with % RSD and the change ratio (%) at current value obtained before/after aptamer immobilization onto the electrode (PGE) surface at different concentrations of DNA aptamer.

|                             | <b>I (<math>\mu</math>A) and RSD (%)</b> | <b>Change ratio (%)<br/>at current</b> |
|-----------------------------|------------------------------------------|----------------------------------------|
| PGE (Control group)         | 212.59 $\pm$ 2.75<br>1.29 %              |                                        |
| 0.25 $\mu$ g/mL Aptamer/PGE | 203.52 $\pm$ 0.60<br>0.29 %              | 4.27 Decrease                          |
| 1 $\mu$ g/mL Aptamer/PGE    | 194.76 $\pm$ 17.29<br>8.88 %             | 8.39 Decrease                          |
| 2.5 $\mu$ g/mL Aptamer/PGE  | 141.11 $\pm$ 6.30<br>4.46 %              | 33.62 Decrease                         |
| 5 $\mu$ g/mL Aptamer/PGE    | 149.55 $\pm$ 13.72<br>9.17 %             | 29.65 Decrease                         |

**Table S2.** The average current values ( $n=3$ ) of redox probe with % RSD and the change ratio (%) at current value obtained before/after aptamer immobilization onto the electrode surface in different immobilization times and after interaction of aptamer with PAT.

|                | <b>I<sub>APT</sub> (μA) and RSD (%)</b> | <b>I<sub>APT-PAT</sub> (μA) and RSD (%)</b> | <b>Change ratio (%) at current</b> |
|----------------|-----------------------------------------|---------------------------------------------|------------------------------------|
| 30 min         | 142.07 ± 2.10                           | 149.41 ± 13.86                              | 5.17 Increase                      |
| immobilization | 1.48 %                                  | 9.28 %                                      |                                    |
| 60 min         | 141.11 ± 6.30                           | 99.62 ± 13.41                               | 29.41 Decrease                     |
| immobilization | 4.46 %                                  | 13.46 %                                     |                                    |

**Table S3.** The average current values ( $n=3$ ) of redox probe with % RSD and the change ratio (%) at current value obtained before/after aptamer interaction with PAT in different interaction times.

|                    | <b>I<sub>APT</sub> (μA) and RSD (%)</b> | <b>I<sub>APT-PAT</sub> (μA) and RSD (%)</b> | <b>Change ratio (%) at current</b> |
|--------------------|-----------------------------------------|---------------------------------------------|------------------------------------|
| 15 min interaction |                                         | 106.84 ± 21.63                              | 24.29 Decrease                     |
|                    |                                         | 20.25 %                                     |                                    |
| 30 min interaction | 141.11 ± 6.30                           | 99.62 ± 13.41                               | 29.41 Decrease                     |
|                    | 4.46 %                                  | 13.46 %                                     |                                    |
| 60 min interaction |                                         | 102.73 ± 9.30                               | 27.20 Decrease                     |
|                    |                                         | 9.05 %                                      |                                    |

## Limit of detection

In this study, the limit of determination was calculated according to the IUPAC method [1].

The analyte's signal at the detection limit (Sdl) is given by:

$$Sdl = S_{reag} + k * \sigma_{reag},$$

where  $S_{reag}$  is the electrochemical signal for a blank,  $\sigma_{reag}$  is the known standard deviation for the blank's electrochemical signal ( $n_{\sigma}=3$  for buffer medium and  $n_{\sigma}=3$  for apple juice medium).

$k$  is a numerical factor chosen according to the confidence level desired. In this study  $k$  value was selected as  $k=3$  (99.86 % confidence level) according to the Long and Winefordner [2].

In our study,  $S_{reag}$  is the electrochemical signal for a blank (aptamer control),  $\sigma_{reag}$  is the known standard deviation for the electrochemical signal of aptamer control ( $n_{\sigma}=3$  for buffer medium and  $n_{\sigma}=3$  for apple juice medium). The electrochemical signal of redox probe (current;  $I$ ,  $\mu A$ ) used to calculate LOD were presented in Table S4 and Table S5 for buffer medium and apple juice medium, respectively. The detection limit of aptasensor was achieved as 0.18 pg/mL in buffer medium and 0.47 pg/mL in apple juice medium by the data given in Table S4 and Table S5, formula and calibration curves.

**Table S4.** The electrochemical signal of redox probe presenting the values ( $I$ ,  $\mu A$ ) of the blank for three times in buffer medium.

| Number | $I$ ( $\mu A$ ) | Average ( $\mu A$ ) | SD ( $\mu A$ ) | RSD (%) |
|--------|-----------------|---------------------|----------------|---------|
| 1      | 121.18          | 120.31              | 0.88           | 0.73    |
| 2      | 120.32          |                     |                |         |
| 3      | 119.42          |                     |                |         |

**Table S5.** The electrochemical signal of redox probe presenting the values ( $I$ ,  $\mu\text{A}$ ) of the blank for three times in apple juice medium.

| Number | $I$ ( $\mu\text{A}$ ) | Average ( $\mu\text{A}$ ) | SD ( $\mu\text{A}$ ) | RSD (%) |
|--------|-----------------------|---------------------------|----------------------|---------|
| 1      | 146.54                | 146.96                    | 0.37                 | 0.25    |
| 2      | 147.18                |                           |                      |         |
| 3      | 147.17                |                           |                      |         |

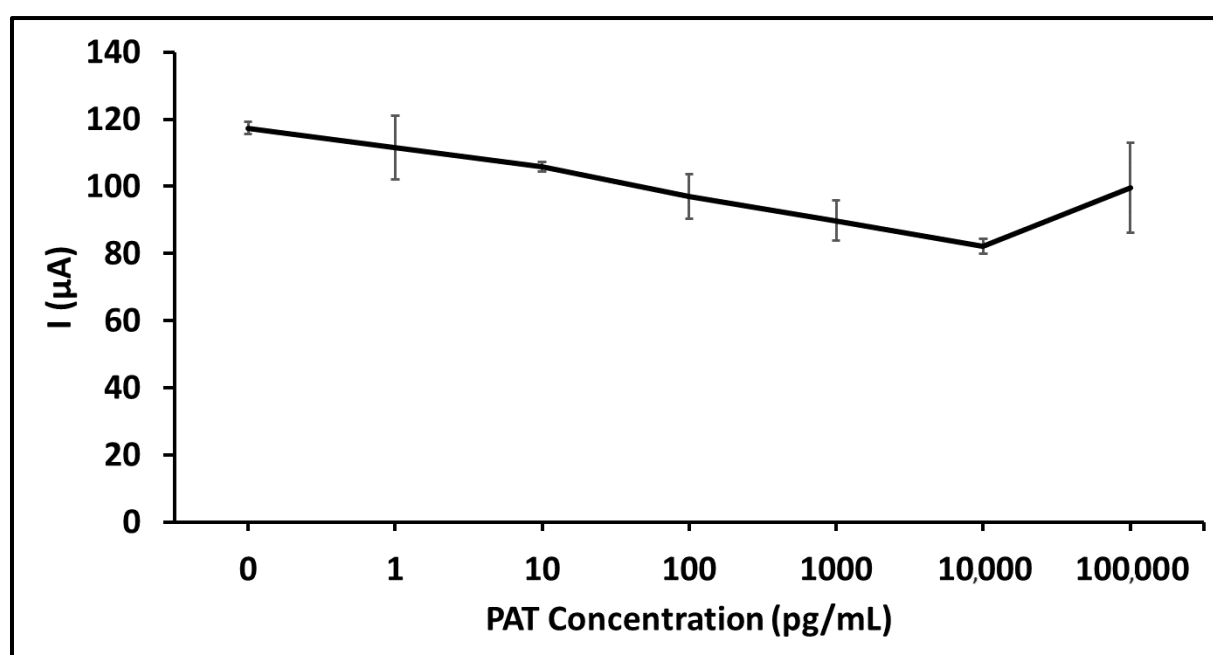

**Figure S1.** Line graph representing the average current values ( $n=3$ ) of redox probe obtained with increasing concentration of PAT in buffer medium (50 mM PBS, pH 7.4).

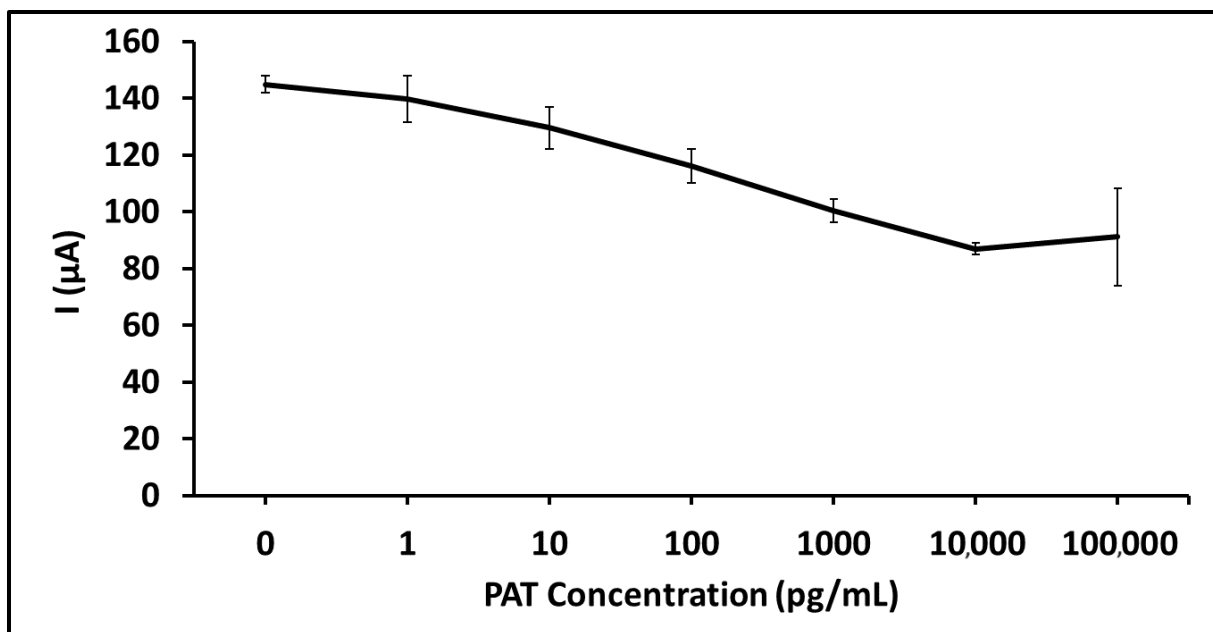

**Figure S2.** Line graph presenting the average current values ( $n=3$ ) of redox probe measured by smartphone connected to portable device while increasing the concentration of PAT (1 to  $10^5$  pg/mL) prepared in diluted apple juice medium.

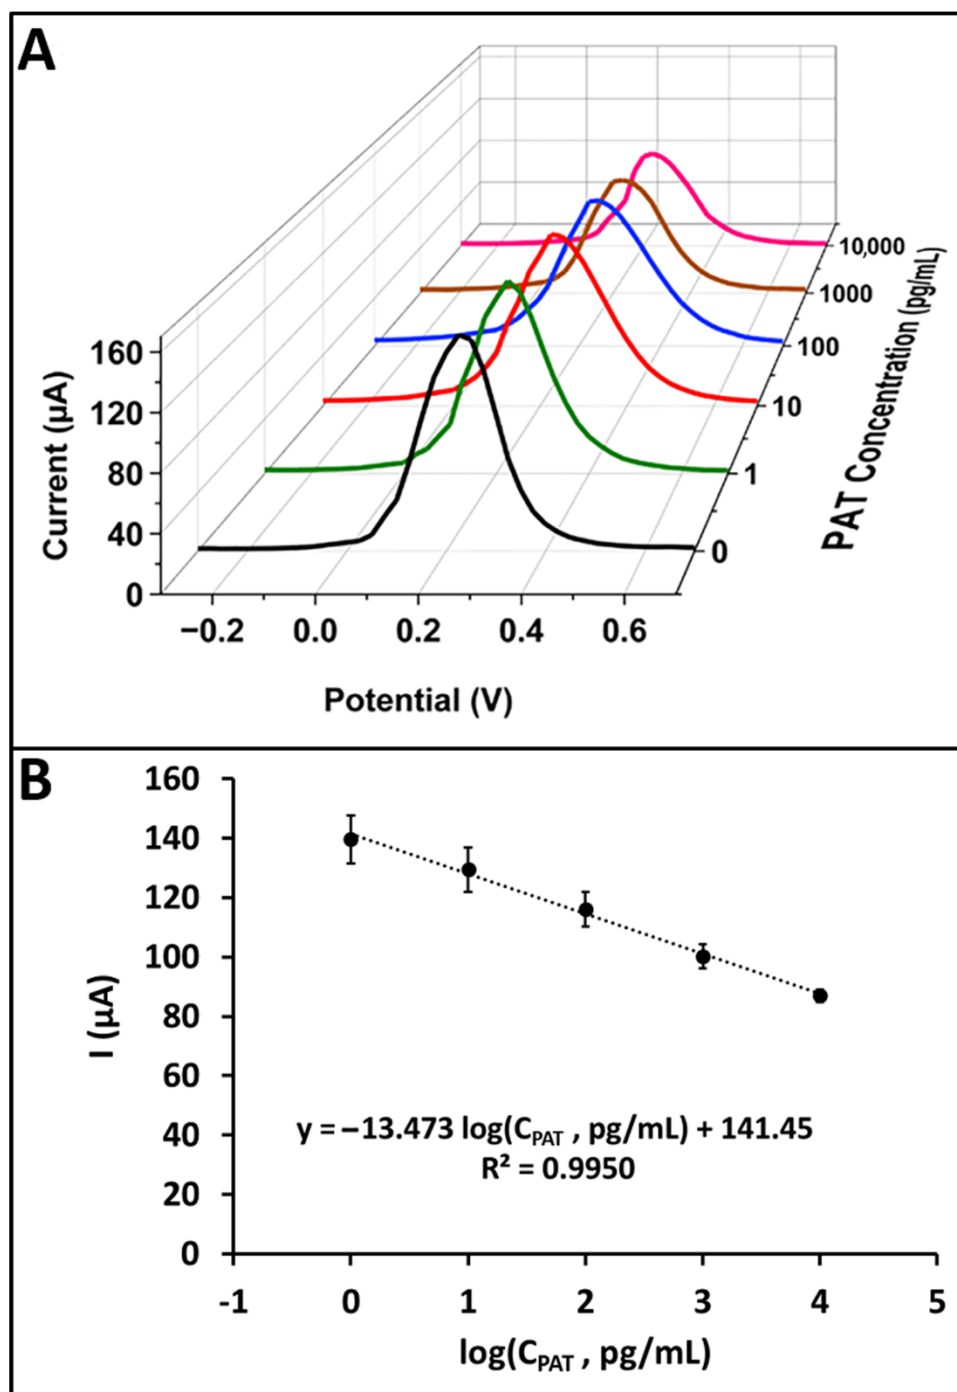

**Figure S3.** (A) Representative voltammograms of redox probe signal recorded by using a smartphone integrated to portable device in the concentration range of PAT varying from 1  $\text{pg/mL}$  to  $10^4$   $\text{pg/mL}$  prepared in diluted apple juice medium (1:50). The voltammograms in black, green, red, blue, brown and pink colour represent 0  $\text{pg/mL}$  (blank), 1  $\text{pg/mL}$ ,  $10^1$   $\text{pg/mL}$ ,

$10^2$  pg/mL,  $10^3$  pg/mL and  $10^4$  pg/mL PAT, respectively. (B) Calibration plot based on the data for detection of PAT in apple juice medium by using smartphone integrated to portable device.

**Table S6.** Reproducibility of PAT aptasensor using a smartphone integrated to portable device in apple juice medium in three different days.

| 10,000 pg/mL PAT | I ( $\mu$ A) | RSD (% , $n=6$ ) |
|------------------|--------------|------------------|
| 1st day          | 85.81        | 5.23             |
|                  | 84.61        |                  |
| 2nd day          | 78.25        |                  |
|                  | 89.44        |                  |
| 3rd day          | 78.79        |                  |
|                  | 85.67        |                  |



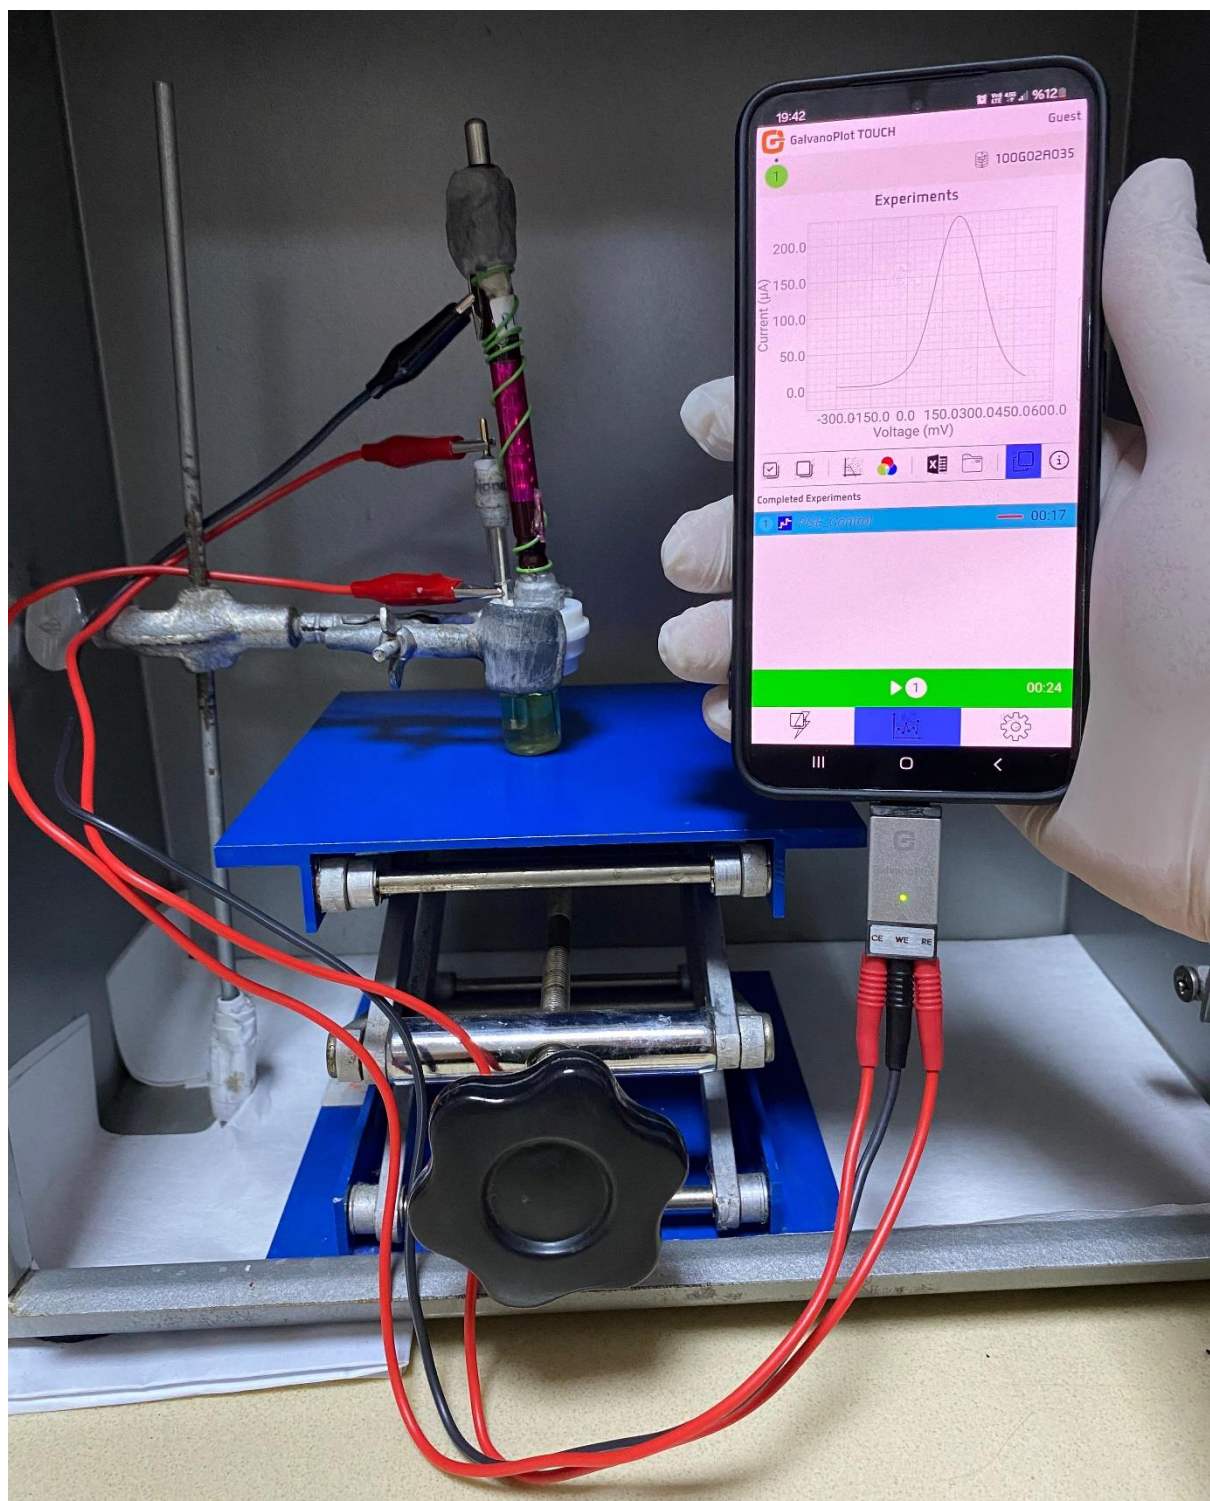

**Figure S4.** Picture of the set-up of the smartphone integrated portable device.

## References

1. IUPAC Nomenclature, Symbols, Units and Their Usage in Spectrochemical Analysis—  
Iii. Analytical Flame Spectroscopy and Associated Non-Flame Procedures. *Pure Appl. Chem.* **1976**, *45*, 105–123, doi:10.1351/pac197645020105.
2. Long, G.L.; Winefordner, J.D. Limit of Detection A Closer Look at the IUPAC Definition. *Anal. Chem.* **1983**, *55*, 712–714.
